# Supplementary material for: Renal function in Japanese HIV-1-positive patients who switch to tenofovir alafenamide fumarate after long-term tenofovir disoproxil fumarate
Source: Research Square preprint supplement (doi:10.21203/rs.3.rs-265066/v1), 2021-03-04
Supplement: Supplementary file 1 [file be793cfbd0a87492185ab154.xlsx]

## Sheet: Table 2
Variable	Parameter Estimate	Standard Error	p-value(Prob>|t|)
age at the start of TAF	-0.238896	0.113185	0.039
sex, female	-4.815	2.57199	0.0662
third agent class drug, DTG	-0.556685	1.24902	0.6574
TDF duration	-0.004262	0.006232	0.4967
Δ eGFR*	0.739028	0.094558	<.0001
body weight†	-0.360379	0.242478	0.1425
BMI†	0.312834	0.798046	0.6965
TG†	0.0073838	0.005236	0.1638
adjusted R2	0.548811
